# Supplementary material for: The genome sequence of Streptomyces rochei 7434AN4, which carries a linear chromosome and three characteristic linear plasmids
Source: PubMed Central journal article supplement (PMC6662830; doi:10.1038/s41598-019-47406-y), 2019-07-29
Supplement: 41598_2019_47406_MOESM1_ESM.pdf [file 41598_2019_47406_MOESM1_ESM.pdf]

## Supplementary materials

### **The genome sequence of *Streptomyces rochei* 7434AN4, which carries a linear chromosome and three characteristic linear plasmids**

Yosi Nindita,<sup>1,2</sup> Zhisheng Cao,<sup>1</sup> Amirudin Akhmad Fauzi,<sup>1</sup> Aiko Teshima,<sup>1</sup> Yuya Misaki,<sup>1,2</sup> Rukman Muslimin,<sup>1</sup> Yingjie Yang,<sup>1</sup> Yuh Shiwa,<sup>3,4</sup> Hirofumi Yoshikawa,<sup>4</sup> Michihira Tagami,<sup>5</sup> Alexander Lezhava,<sup>5</sup> Jun Ishikawa,<sup>6</sup> Makoto Kuroda,<sup>7</sup> Tsuyoshi Sekizuka,<sup>7</sup> Kuninobu Inada,<sup>8</sup> Haruyasu Kinashi<sup>1</sup> & Kenji Arakawa<sup>1,2\*</sup>

<sup>1</sup>Department of Molecular Biotechnology, Graduate School of Advanced Sciences of Matter, and <sup>2</sup>Unit of Biotechnology, Division of Biological and Life Sciences, Graduate School of Integrated Sciences for Life, Hiroshima University, 1-3-1 Kagamiyama, Higashi-Hiroshima 739-8530, Japan. <sup>3</sup>NODAI Genome Research Center and <sup>4</sup>Department of Bioscience, Tokyo University of Agriculture, 1-1-1 Sakuragaoka, Setagaya-ku, Tokyo 156-8502, Japan. <sup>5</sup>Omics Science Center, RIKEN, 1-7-22 Suehiro-cho, Tsurumi-ku, Yokohama, Kanagawa 230-0045, Japan. <sup>6</sup>Department of Bioactive Molecules and <sup>7</sup>Pathogen Genomics Center, National Institute of Infectious Diseases, 1-23-1 Toyama, Shinjuku-ku, Tokyo 162-8640, Japan. <sup>8</sup>Natural Science Center for Basic Research and Development, Hiroshima University, 1-4-2 Kagamiyama, Higashi-Hiroshima 739-8526, Japan.

\* Correspondence should be addressed to K.A. (email: karakawa@hiroshima-u.ac.jp)

## List of Supplementary materials

Supplementary Fig. S1

Nucleotide sequence of the *oriC*-franking region.

Supplementary Fig. S2

Genome size estimation of *S. rochei* 7434AN4 by pulsed-field gel electrophoresis (PFGE).

Supplementary Fig. S3

Comparison of *rrn* operons among *S. rochei* and other *Streptomyces* species.

Supplementary Fig. S4

Comparison of biosynthetic gene cluster for pentamycin in *S. rochei* with that for filipin in *S. avermitilis*.

Supplementary Fig. S5

Pair-wise genome comparison of the *S. rochei* chromosome with five reference *Streptomyces* strains.

Supplementary Fig. S6

Genes involved in branched-chain fatty acid biosynthesis pathway in *S. rochei* 7434AN4.

Supplementary Table S1

Bacterial strains and oligonucleotides used in this study.

Supplementary Table S2

Lists of rRNA operons in the *S. rochei* 7434AN4 chromosome.

Supplementary Table S3

Lists of tRNA genes in the *S. rochei* 7434AN4 chromosome.

Supplementary Table S4

List of TTA codon-containing ORFs in the *S. rochei* chromosome.

Supplementary Table S5

TTA-containing ORFs in the *S. rochei* chromosome classified by their occurrence in other *Streptomyces* species.

Supplementary Table S6

Protein families in *S. rochei* 7434AN4 and other four completely sequenced *Streptomyces*.

Supplementary Table S7

Location of CRISPR-associate (*cas*) genes and CRISPR repeats in the *S. rochei* chromosome.

Supplementary Table S8

Sequences of CRISPR repeats in the *S. rochei* chromosome.

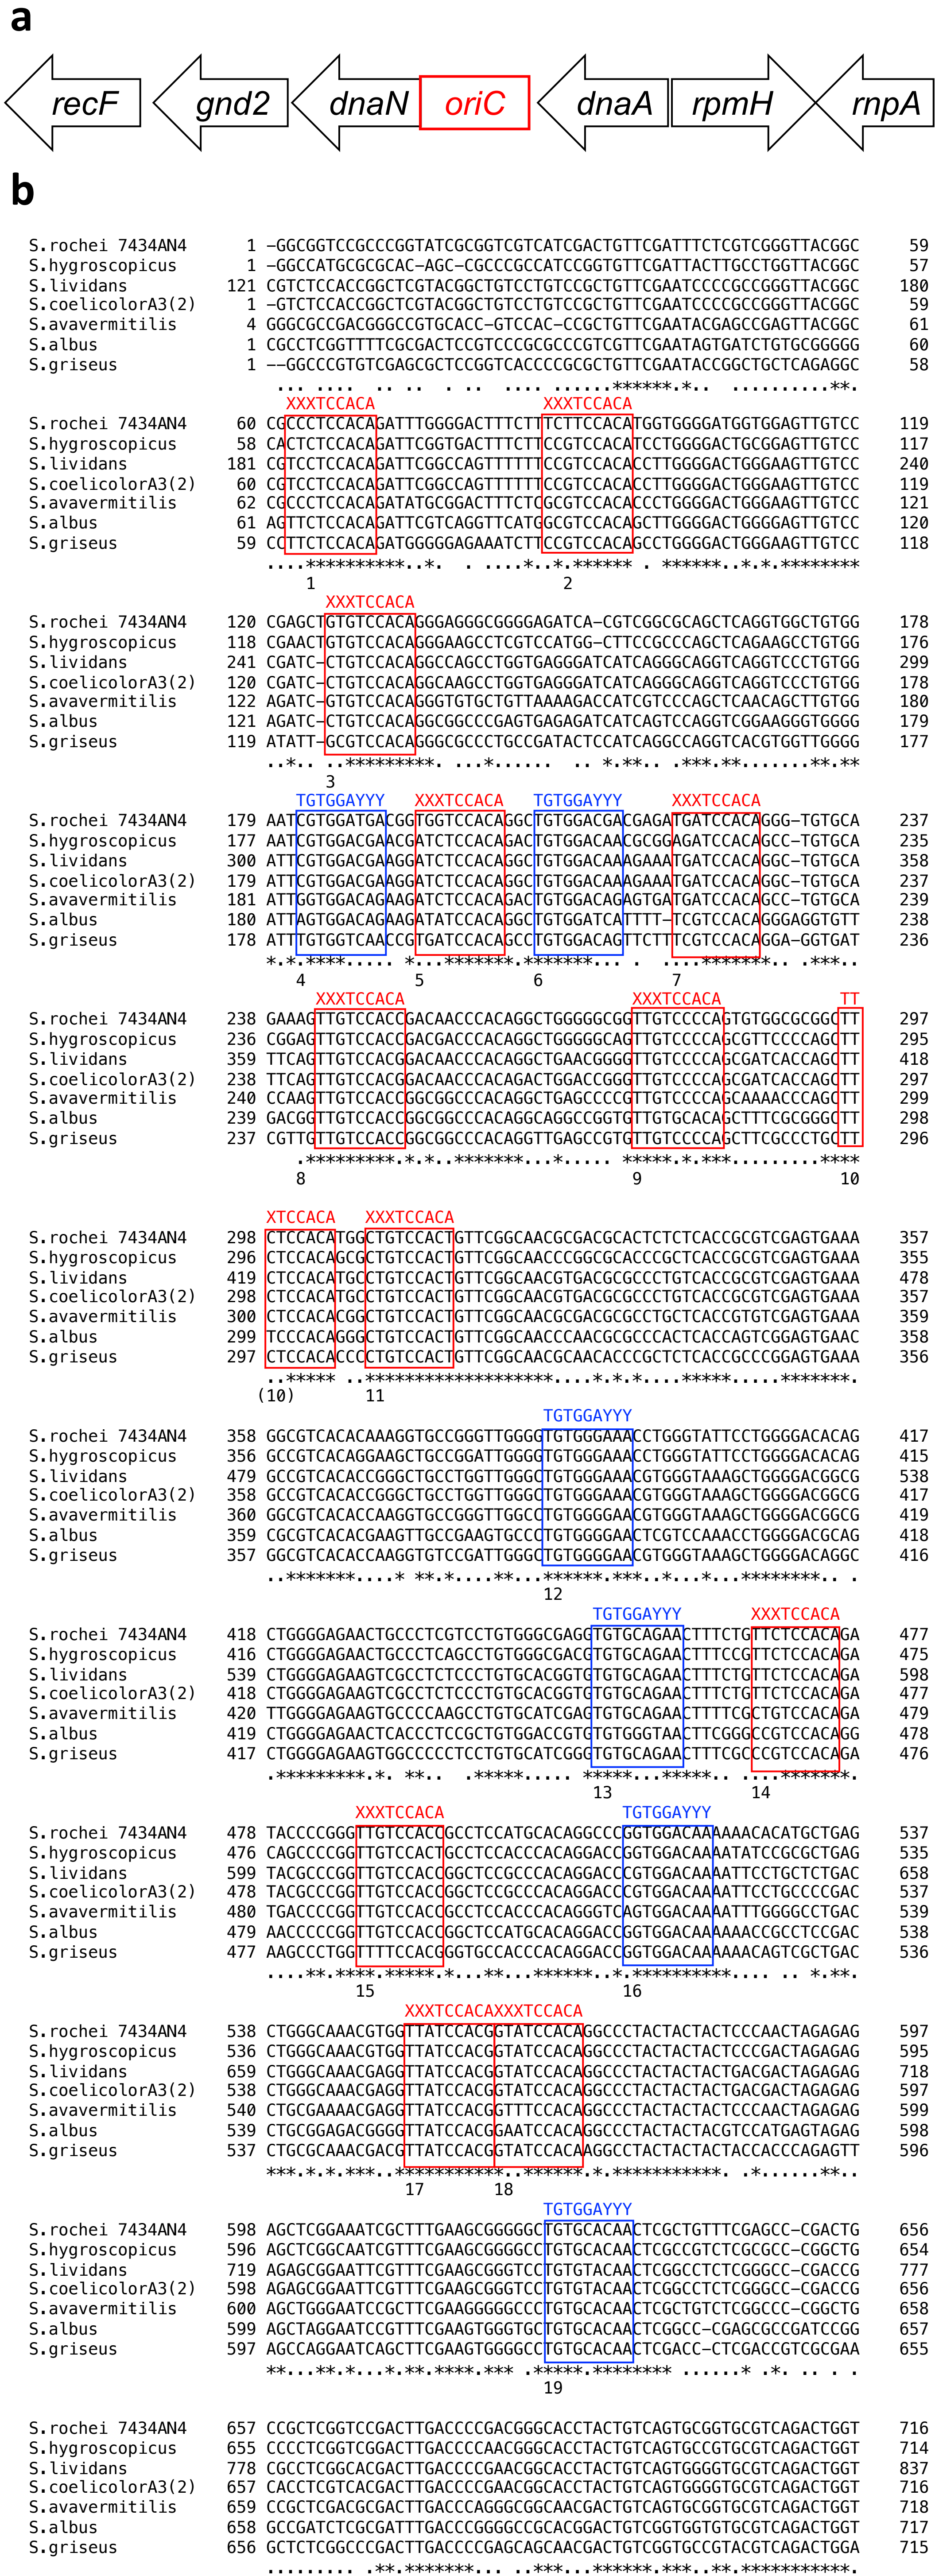

**Figure S1.** Nucleotide sequence of the *oriC*-flanking region. (a) *oriC* and its flanking region of *S. rochei* 7434AN4. Putative *oriC* region of *S. rochei* 7434AN4 is shown in the interspace region between *dnaA* and *dnaN* region (nt 4,098,733 – 4,097,667). (b) Alignment of the nucleotide sequences of the *Streptomyces* putative *oriC* region (Query 7434AN4; nt 4,098,461– 4,097,683). Putative *dnaA* boxes are (T/C)(T/C)(G/A/C)TCCACA (direction →) and TGTGGA(C/T/G)(A/G)(A/G) (direction ←) (Microbiology, 144, 1281-1290 (1998)).

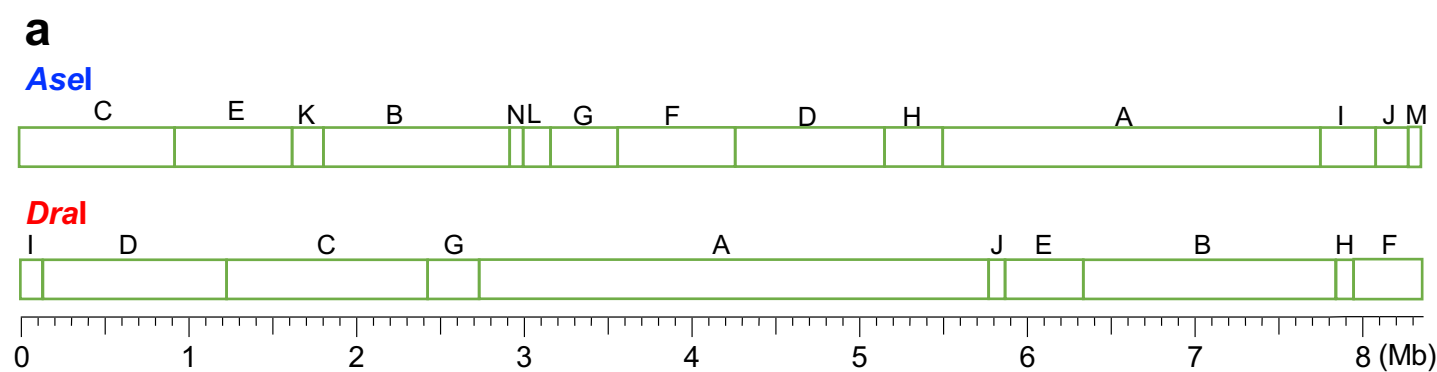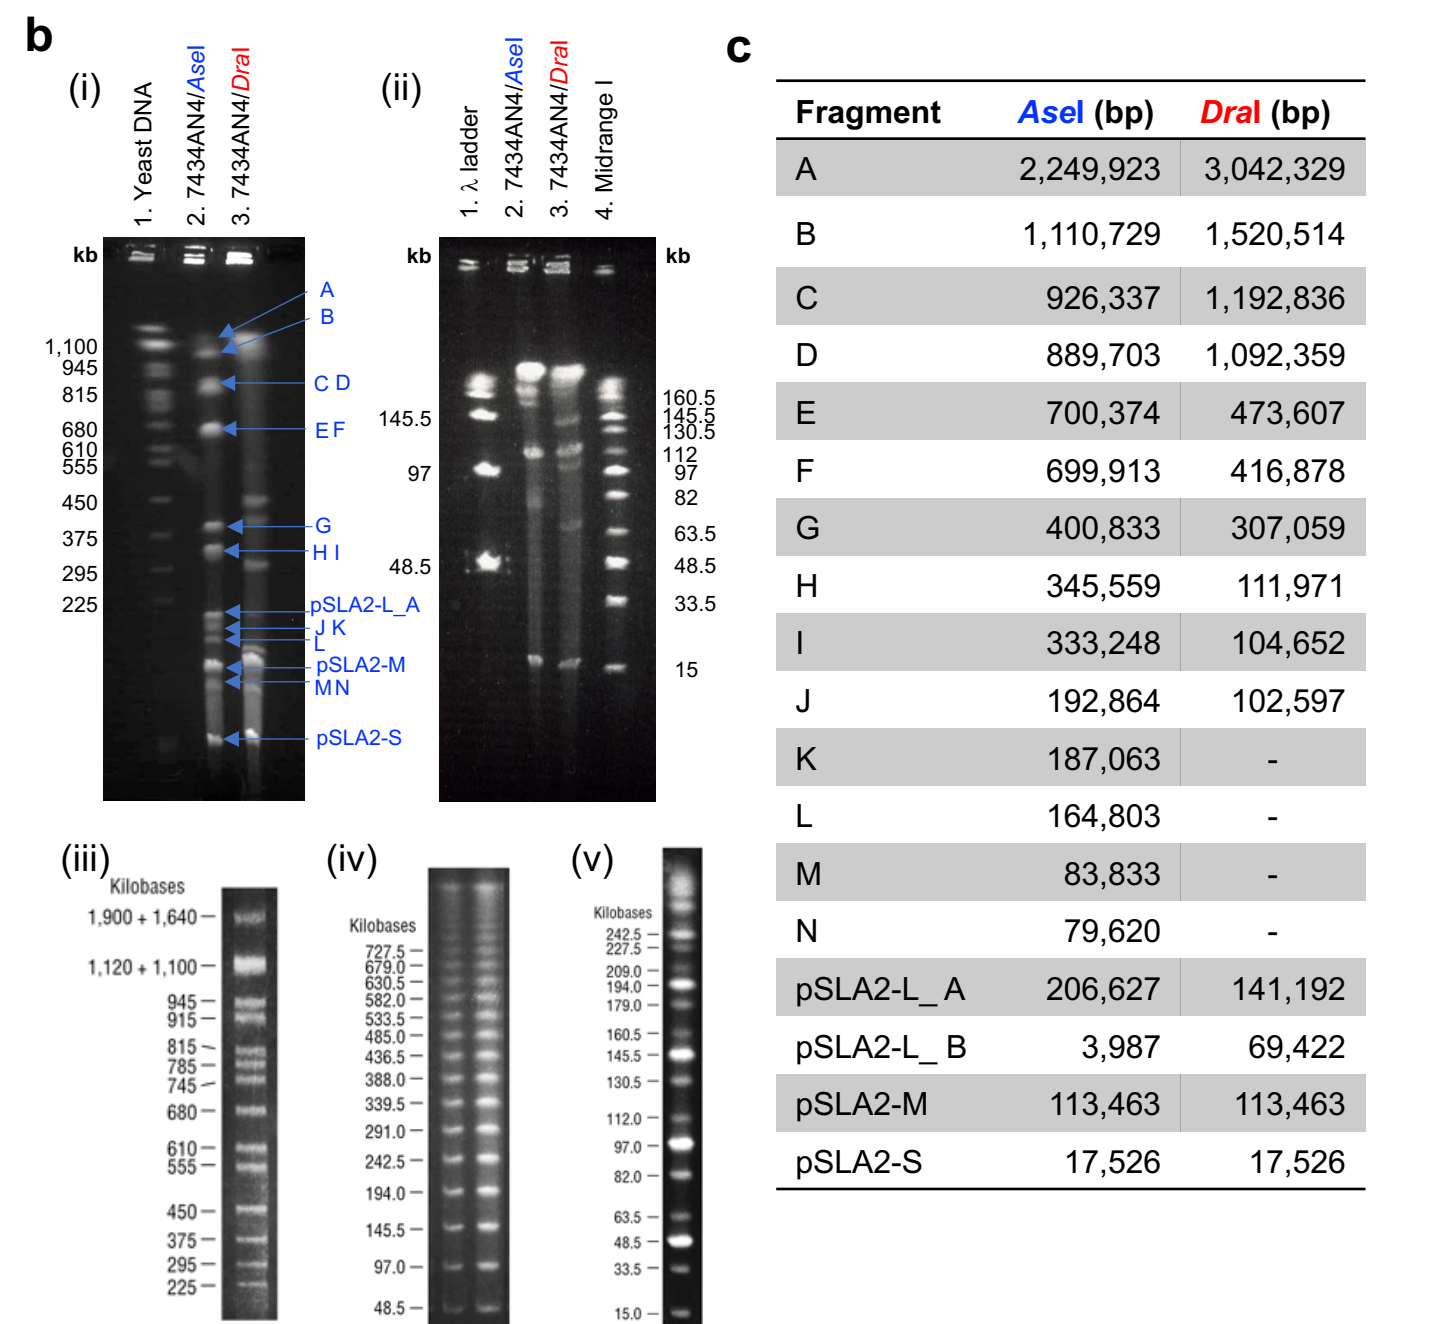

**Figure S2.** Genome size estimation of *S. rochei* 7434AN4 by pulsed-field gel electrophoresis (PFGE). (a) Physical maps of *Asel*- and *Dral*-fragments of the *S. rochei* chromosome. (b) PFGE of the DNA samples prepared in gels and digested either *Asel* or *Dral*. (i) 1. Yeast chromosome PFG marker, 2. 7434AN4 total DNA digested with *Asel*, 3. 7434AN4 total DNA digested with *Dral*, (ii) 1.  $\lambda$  ladder pulsed-field gel (PFG) marker, 2. 7434AN4 total DNA digested with *Asel*, 3. 7434AN4 total DNA digested with *Dral*, 4. Midrange I PFG marker. (iii) Yeast chromosome PGF marker (New England Biolabs cat# N0345). (iv)  $\lambda$  ladder PFG marker (New England Biolabs cat# N0340). (v) Midrange I PFG marker (New England Biolabs cat# N3551). (c) Estimated DNA sizes of the *Asel*- and *Dral*-fragments of the *S. rochei* total DNA.

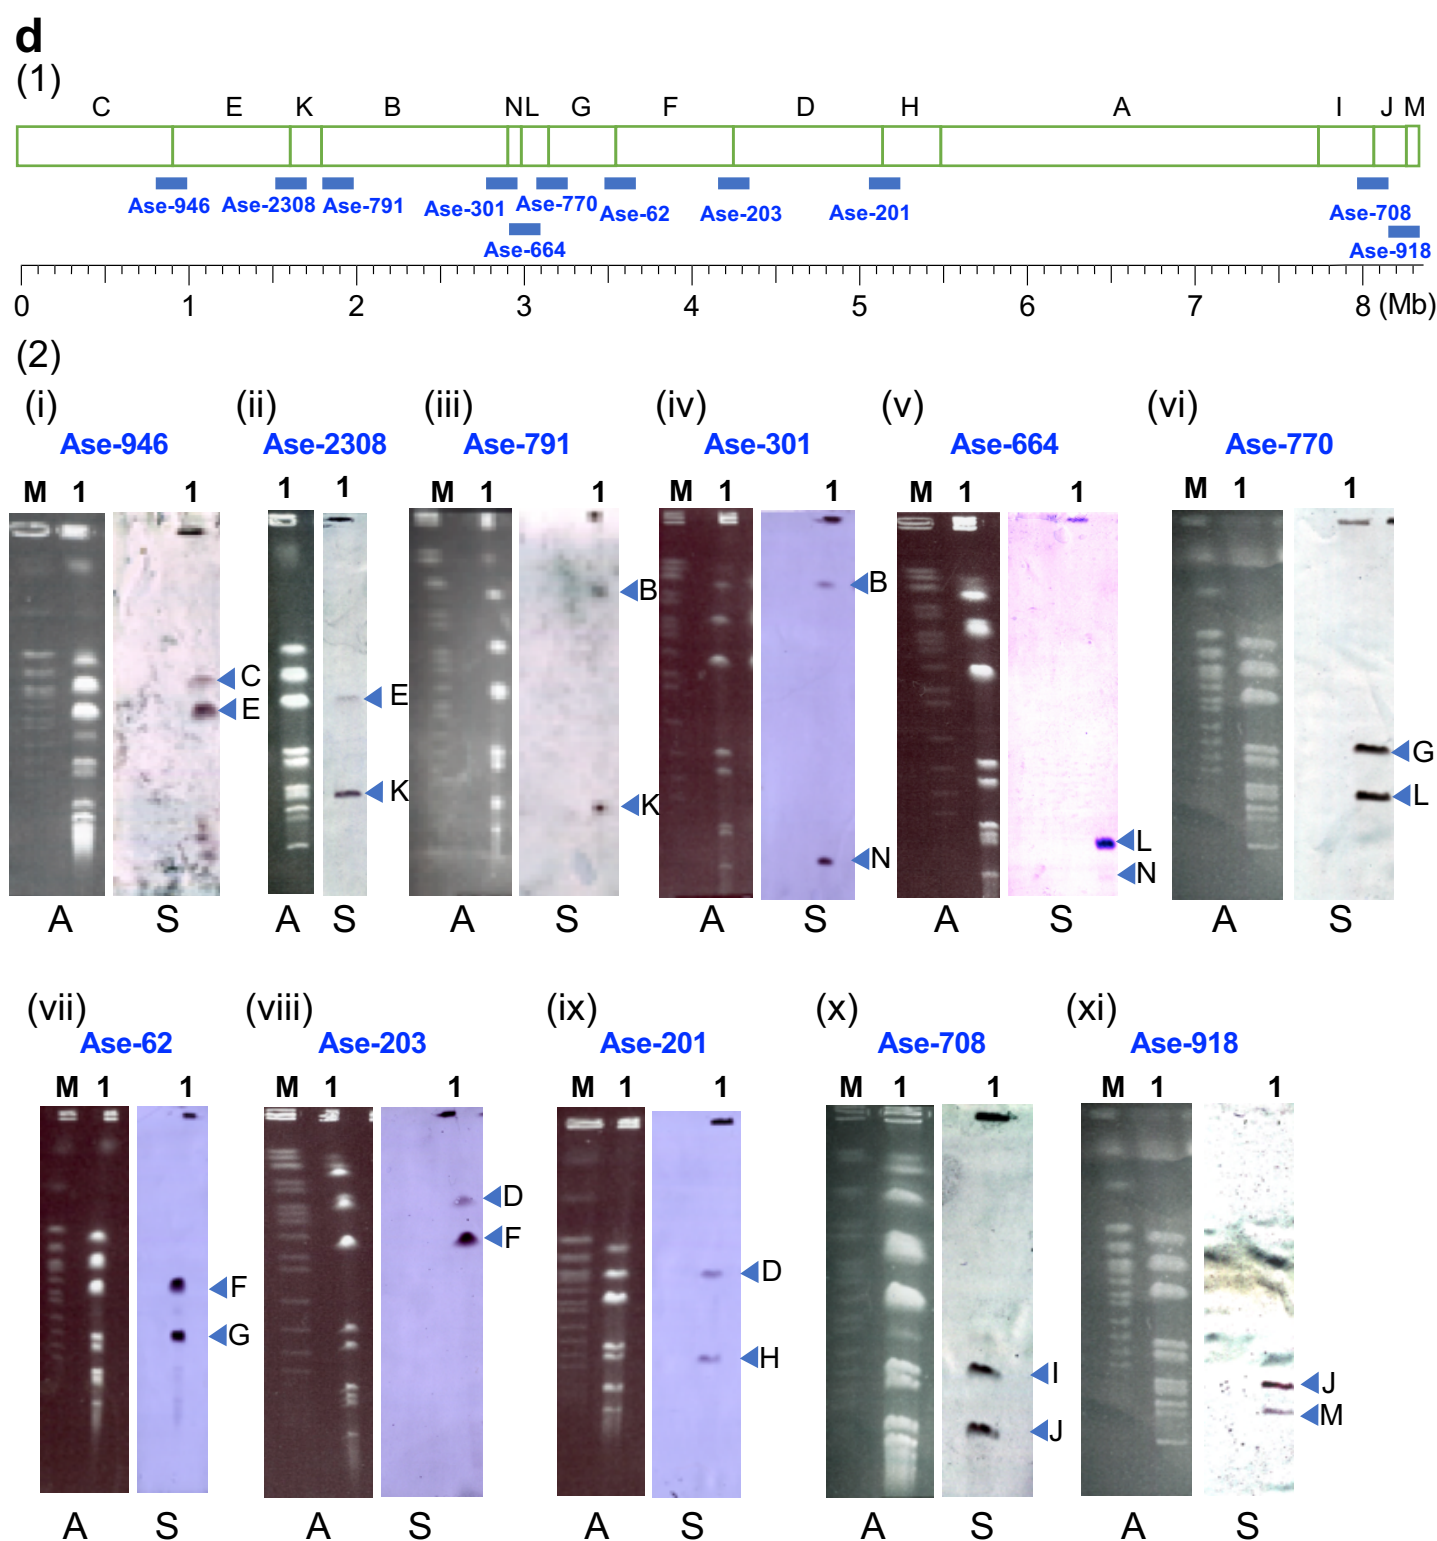

**Figure S2 (continued).** Genome size estimation of *S. rochei* 7434AN4 by pulsed-field gel electrophoresis (PFGE). (d) Confirmation of the location of *AseI*-fragments in the *S. rochei* chromosome. (1) Physical map of *AseI*-fragment of the *S. rochei* chromosome. Locations of DNA probe for Southern hybridization were also shown. (2) PFGE and Southern blotting images. Panels shown as “A” indicate PFGE image, while panels “S” indicate Southern blotting image. PFGE gels (panel “A”) were hybridized with the following probes; (i) *Ase-946* (PCR fragment between nt 925,564-927,697), (ii) *Ase-2308* (nt 1,625,990-1,628,415), (iii) *Ase-791* (nt 1,813,314-1,814,826), (iv) *Ase-301* (nt 2,923,341-2,925,323), (v) *Ase-664* (nt 3,003,812-3,006,047), (vi) *Ase-770* (nt 3,167,813-3,170,278), (vii) *Ase-62* (nt 3,568,362-3,570,807), (viii) *Ase-203* (nt 4,268,134-4,270,234), (ix) *Ase-201* (nt 5,158,768-5,161,337), (x) *Ase-708* (nt 8,087,283-8,089,195), (xi) *Ase-918* (nt 8,279,773-8,281,515). Lanes M, Yeast chromosome PFG marker; lanes 1, *S. rochei* total DNA digested with *AseI*. Primers for probe preparation were shown in Table S1. We used same agarose gel sample for (vi) and (xi). Reprobing was performed in the analysis of *Ase-918*. First probe *Ase-770* was stripped off from nylon membrane.

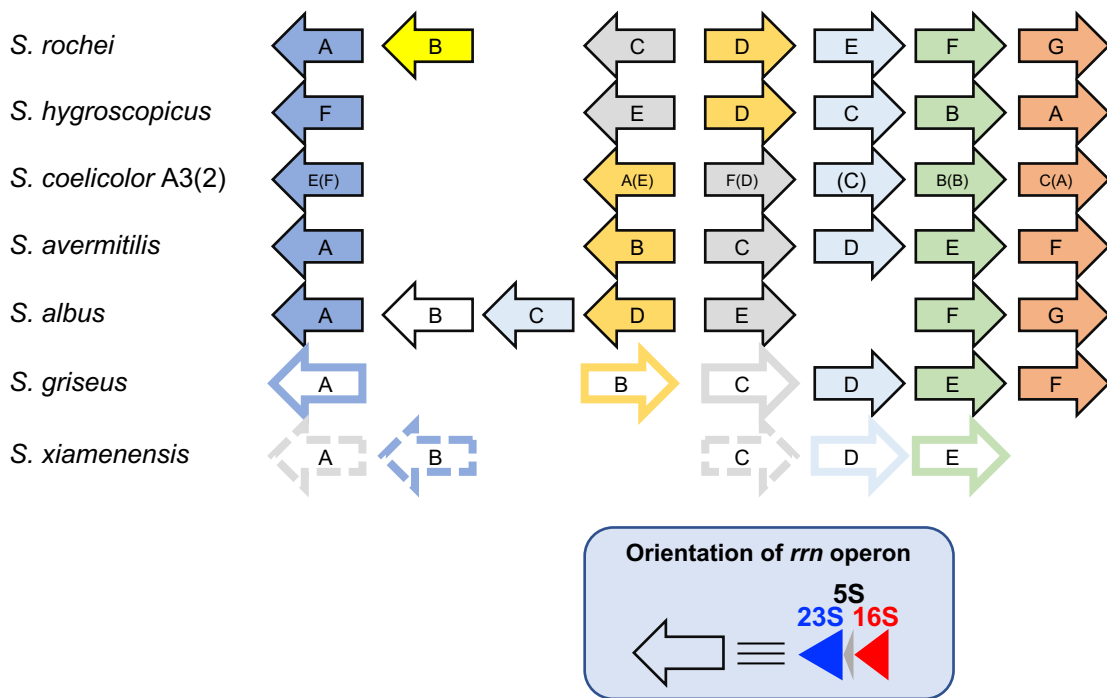

**Figure S3.** Comparison of *rrn* operons among *S. rochei* and other *Streptomyces* species.

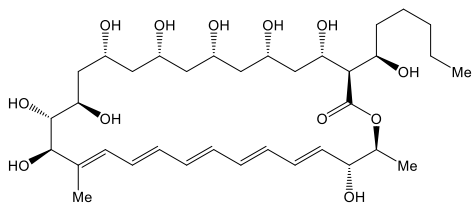

**Pentamycin**

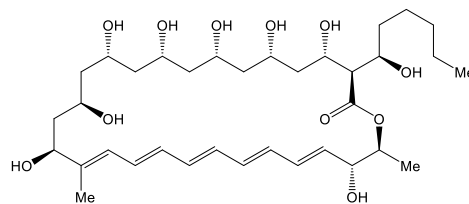

**Filipin (=14-deoxypentamycin)**

**Filipin cluster (*S. avermitilis* nt 487,415-567,017)**

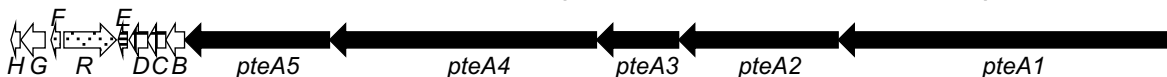

**Pentamycin cluster (*S. rochei* nt 7,951,834-8,033,316)**

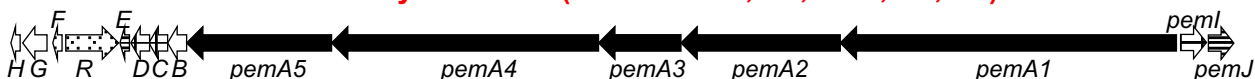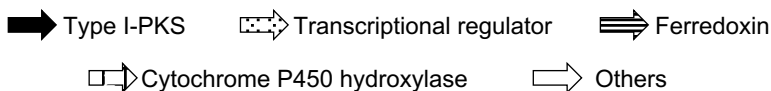

| Filipin cluster (aa) | Pentamycin cluster (aa) | Identity (%)    |
|----------------------|-------------------------|-----------------|
| pteA1 (7746)         | SRO_7223; pemA1 (7807)  | 6440/7655 (84%) |
| pteA2 (3564)         | SRO_7224; pemA2 (3598)  | 3107/3603 (86%) |
| pteA3 (1835)         | SRO_7225; pemA3 (1821)  | 1556/1834 (84%) |
| pteA4 (6145)         | SRO_7226; pemA4 (6155)  | 5228/6158 (84%) |
| pteA5 (3352)         | SRO_7227; pemA5 (3353)  | 2873/3359 (85%) |
| pteB (418)           | SRO_7228; pemB (418)    | 388/418 (92%)   |
| pteC (399)           | SRO_7229; pemC (399)    | 369/399 (92%)   |
| pteD (404)           | SRO_7230; pemD (404)    | 360/404 (89%)   |
| pteE (64)            | SRO_7231; pemE (64)     | 51/64 (79%)     |
| pteR (1197)          | SRO_7232; pemR (1189)   | 945/1182 (79%)  |
| pteF (232)           | SRO_7233; pemF (204)    | 180/204 (88%)   |
| pteG (547)           | SRO_7234; pemG (547)    | 492/545 (90%)   |
| pteH (255)           | SRO_7235; pemH (255)    | 207/255 (81%)   |
| -                    | SRO_7222; pemI (405)    | -               |
| -                    | SRO_7221; pemJ (64)     | -               |

**Figure S4.** Comparison of biosynthetic gene cluster for pentamycin in *S. rochei* 7434AN4 with that for filipin in *S. avermitilis*.



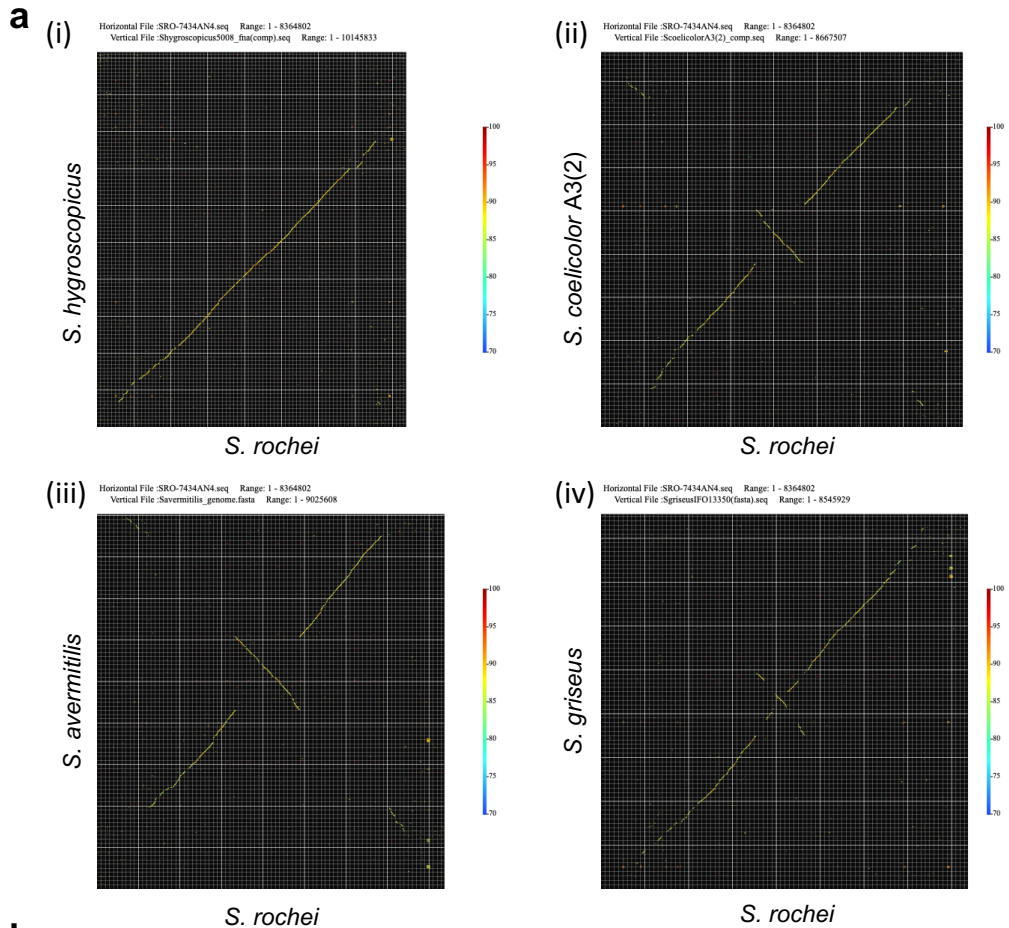

**b**

| Reference strain           | Conserved region in <i>S. rochei</i> and references |                     |
|----------------------------|-----------------------------------------------------|---------------------|
|                            | <i>S. rochei</i>                                    | Reference strain    |
| <i>S. hygrosopicus</i>     | 545,022-7,559,915                                   | 2,338,139-9,459,009 |
| <i>S. coelicolor A3(2)</i> | 1,312,392-7,187,111                                 | 1,052,906-7,520,687 |
| <i>S. avermitilis</i>      | 1,280,438-6,892,333                                 | 1,938,250-8,456,079 |
| <i>S. griseus</i>          | 1,305,391-6,830,535                                 | 1,047,678-7,484,966 |

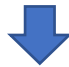

Highly conserved core region in *S. rochei* ; nt 1.31-6.83 Mb

**Figure S5.** Pair-wise genome comparison of the *S. rochei* chromosome with five reference *Streptomyces* strains. (a) Dots represent reciprocal best matches. Horizontal axes are the *S. rochei* chromosome. Vertical axes are the chromosome of (i) *S. hygrosopicus*, (ii) *S. coelicolor A3(2)*, (iii) *S. avermitilis*, and (iv) *S. griseus*. (b) Highly conserved region in *S. rochei* and four reference strains.

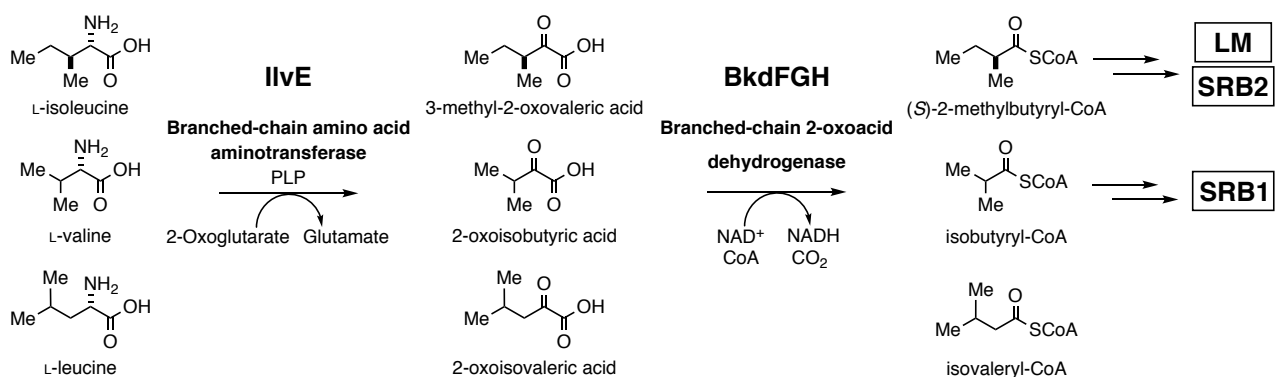

Branched-chain 2-oxoacid dehydrogenase gene cluster in *Streptomyces*

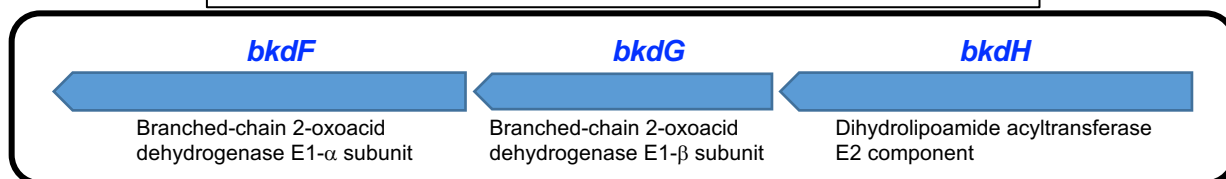

| Fab enzyme | Proposed function                                           | <i>S. rochei</i> |            | <i>S. avermitilis</i> |            |
|------------|-------------------------------------------------------------|------------------|------------|-----------------------|------------|
|            |                                                             | SRO_locus        | Amino acid | SCO_locus             | Amino acid |
| IlvE       | Branched-chain amino acid transferase                       | SRO_2307         | 362        | SAVERM_2717           | 362        |
| BkdF       | Branched-chain 2-oxoacid dehydrogenase E1- $\alpha$ subunit | SRO_3599         | 417        | SAVERM_4376           | 406        |
| BkdG       | Branched-chain 2-oxoacid dehydrogenase E1- $\beta$ subunit  | SRO_3598         | 325        | SAVERM_4377           | 325        |
| BkdH       | Dihydrolipoamide acyltransferase E2 component               | SRO_3597         | 474        | SAVERM_4378           | 462        |

**Figure S6.** Genes involved in branched-chain fatty acid biosynthesis pathway in *S. rochei* 7434AN4. 2-Methylbutyryl-CoA starter units (C14-C17 in LM and C7-C10,C-9' in SRB2) are originated from L-isoleucine. Isobutyryl-CoA starter unit (C7-C9,C-9' in SRB1) is originated from L-valine.

**Table S1. Bacterial strains and oligonucleotides used in this study**

| Strains          | Properties/product                            | Source/ref.         |
|------------------|-----------------------------------------------|---------------------|
| <i>S. rochei</i> |                                               |                     |
| 7434AN4          | Wild type (pSLA2-L,M,S)                       | Kinashi et al. 1994 |
| 51252            | Ultraviolet irradiation of 7434AN4 (pSLA2-L)  | Kinashi et al. 1994 |
| 2-39             | Protoplast regeneration of 51252 (no plasmid) | Kinashi et al. 1994 |
| YN-P7            | Protoplast regeneration of 51252 (no plasmid) | Nindita et al. 2015 |
| YN-P145          | Protoplast regeneration of 51252 (no plasmid) | Nindita et al. 2015 |

  

| Designed oligonucleotides | Nucleotide sequence                   | Region in the chromosome (purpose)                                |
|---------------------------|---------------------------------------|-------------------------------------------------------------------|
| YN-TIR-f                  | 5'-AAGAATTCCCTTCCACGCCTGGCGGCAC-3'    | nt 52,079- (TIR detection)                                        |
| YN-TIR-r                  | 5'-TTAAGCTTCCCCTACCACGCCCCGGTCT-3'    | nt 55,053- complement (TIR detection)                             |
| scf488-Anti               | 5'-TCCGCACACCTTCCAGCTTGGTGTCCAAGT-3'  | nt 2,389,384- (franking region beyond <i>rmA</i> -16S)            |
| scf418-UP                 | 5'-TGTGGGCGAGCCCGCGCTCAAGGACCGCAA-3'  | nt 2,395,771- complement (franking region beyond <i>rmA</i> -5S)  |
| scf430-Anti               | 5'-GGGGGATTCTCTGGTCCCCTCTGGTAGCTA-3'  | nt 3,141,102- (franking region beyond <i>rmB</i> -16S)            |
| scf585-UP                 | 5'-CCGCCGCGCCCGGATAGTGGCCGACCACAA-3'  | nt 3,147,450- complement (franking region beyond <i>rmB</i> -5S)  |
| scf584-Anti               | 5'-GGCCCGGTACAGCTCGAAGTGGGAGATGAA-3'  | nt 3,639,770- (franking region beyond <i>rmC</i> -16S)            |
| scf416-UP                 | 5'-GACGATCAACGCCATCCGCGAGCTGGAGAA-3'  | nt 3,646,123- complement (franking region beyond <i>rmC</i> -5S)  |
| scf574-Anti               | 5'-GGTGCCGGGCACGGAGAAGTGGGAGTACGT-3'  | nt 4,365,140- complement (franking region beyond <i>rmD</i> -16S) |
| scf413-UP                 | 5'-GCTGGAGGCGATGCGCCTCGCGACCGTCTT-3'  | nt 4,358,753- (franking region beyond <i>rmD</i> -5S)             |
| scf443-Anti               | 5'-GCTGGACGCGGCACCGGTGGAACAGGGACT-3'  | nt 4,934,256- complement (franking region beyond <i>rmE</i> -16S) |
| scf412-UP                 | 5'-CCTGTTCTCTCCGGCGCCATCGAAGGGTT-3'   | nt 4,927,974- (franking region beyond <i>rmE</i> -5S)             |
| scf422-Anti               | 5'-CCGCCACGGTCGCCACCGCGTCTCATCA-3'    | nt 6,219,749- complement (franking region beyond <i>rmF</i> -16S) |
| scf417-UP                 | 5'-GTTCCGGGAGCCCGGACATGTGTACGTCTA-3'  | nt 6,212,930- (franking region beyond <i>rmF</i> -5S)             |
| scf439-Anti               | 5'-GGAGGATGCCACCATCACAGGAGCATCA-3'    | nt 6,682,773- complement (franking region beyond <i>rmG</i> -16S) |
| scf419-UP                 | 5'-GCCGTGTCCGCTGTCGTCGACCACGACGAA-3'  | nt 6,676,445- (franking region beyond <i>rmG</i> -5S)             |
| Ase-946f                  | 5'-TTGAATTCGTCGTTGTCGTCATGATGTTCT-3'  | nt 925,564- (boundary between AseI-C and AseI-E)                  |
| Ase-946r                  | 5'-TTCTGCAGCTGTGTCTCAAACCTACCCACA-3'  | nt 927,697- complement (boundary between AseI-C and AseI-E)       |
| Ase-2308f                 | 5'-TTGAATTCGTCGTCGTCGTCGTCGTCGTC-3'   | nt 1,625,990- (boundary between AseI-E and AseI-K)                |
| Ase-2308r                 | 5'-TTCTGCAGGCAGGAGTTGACCGACAAGATA-3'  | nt 1,628,415- complement (boundary between AseI-E and AseI-K)     |
| Ase-791f                  | 5'-TTGAATTCACCTCATGGGTGAGCACGGCAT-3'  | nt 1,813,314- (boundary between AseI-K and AseI-B)                |
| Ase-791r                  | 5'-TTCTGCAGCGAATTCATACATGAGGGAGAA-3'  | nt 1,814,826- complement (boundary between AseI-K and AseI-B)     |
| Ase-301f                  | 5'-TTGAATTCGAACCACTAGACCGAGCTGAAC-3'  | nt 2,923,341- (boundary between AseI-B and AseI-N)                |
| Ase-301r                  | 5'-TTGAATTCCTGTACACGCAGAAATTTCCAG-3'  | nt 2,925,323- complement (boundary between AseI-B and AseI-N)     |
| Ase-664f                  | 5'-TTGAATTCGGTTGATGTTCTTCTCTGGTC-3'   | nt 3,006,047- complement (boundary between AseI-N and AseI-L)     |
| Ase-664R                  | 5'-TTGAATTCGTAGGCCACGCCCGTGAAGAGC-3'  | nt 3,003,812 - (boundary between AseI-N and AseI-L)               |
| Ase-770f                  | 5'-TTGAATTCGTGCTTGTCTCATCGACTTCAT-3'  | nt 3,167,813- (boundary between AseI-L and AseI-G)                |
| Ase-770r                  | 5'-TTCTGCAGGAACTCCACCTGGAGACCAAG-3'   | nt 3,170,278- (boundary between AseI-L and AseI-G)                |
| Ase-62F                   | 5'-TTGAATTCCAACATGTTCTCGGTGTTCTTC-3'  | nt 3,570,807- complement (boundary between AseI-G and AseI-F)     |
| Ase-62r                   | 5'-TTGAATTCCCGCATTTACAGGAGCTATTTAC-3' | nt 3,568,362- (boundary between AseI-G and AseI-F)                |
| Ase-203f                  | 5'-TTGAATTCACCTCGCTCTTAAAACTAACG-3'   | nt 4,270,234- complement (boundary between AseI-F and AseI-D)     |
| Ase-203r                  | 5'-TTGAATTCCTCTTGTGAGGTCTCGTCTCT-3'   | nt 4,268,134- (boundary between AseI-F and AseI-D)                |
| Ase-201f                  | 5'-TTGAATTCATCAAGGAGCATGTGAAGG-3'     | nt 5,158,768- (boundary between AseI-D and AseI-H)                |
| Ase-201r                  | 5'-TTGAATTCGCATGGTCTACGGCTAGGAATA-3'  | nt 5,161,337- complement (boundary between AseI-D and AseI-H)     |
| Ase-708f                  | 5'-TTGAATTCAGGACTGGAGCCTCTGTAGG-3'    | nt 8,089,195- complement (boundary between AseI-I and AseI-J)     |
| Ase-708r                  | 5'-TTCTGCAGGTCGAGCAGGCTTCTGAGATAC-3'  | nt 8,087,283- (boundary between AseI-I and AseI-J)                |
| Ase-918f                  | 5'-TTGAATTCCTCGCGATGTGGGATGCAGT-3'    | nt 8,279,773- (boundary between AseI-J and AseI-M)                |
| Ase-918r                  | 5'-TTCTGCAGGGTCAGCAGACGGTAGTAGG-3'    | nt 8,281,515- complement (boundary between AseI-J and AseI-M)     |

**Table S2.** Lists of rRNA genes in the *S. rochei* 7434AN4 chromosome.

| No.         | Locus tag | Direction | Start   | Stop    | Product                       |
|-------------|-----------|-----------|---------|---------|-------------------------------|
| <i>rrnA</i> | SRO_r01   | –         | 2389969 | 2389854 | <i>rrnA</i> 5S ribosomal RNA  |
|             | SRO_r02   | –         | 2393162 | 2390043 | <i>rrnA</i> 23S ribosomal RNA |
|             | SRO_r03   | –         | 2394974 | 2393447 | <i>rrnA</i> 16S ribosomal RNA |
| <i>rrnB</i> | SRO_r04   | –         | 3141720 | 3141605 | <i>rrnB</i> 5S ribosomal RNA  |
|             | SRO_r05   | –         | 3144914 | 3141794 | <i>rrnB</i> 23S ribosomal RNA |
|             | SRO_r06   | –         | 3146761 | 3145234 | <i>rrnB</i> 16S ribosomal RNA |
| <i>rrnC</i> | SRO_r07   | –         | 3640341 | 3640226 | <i>rrnC</i> 5S ribosomal RNA  |
|             | SRO_r08   | –         | 3643534 | 3640415 | <i>rrnC</i> 23S ribosomal RNA |
|             | SRO_r09   | –         | 3645371 | 3643844 | <i>rrnC</i> 16S ribosomal RNA |
| <i>rrnD</i> | SRO_r10   | +         | 4359548 | 4361075 | <i>rrnD</i> 16S ribosomal RNA |
|             | SRO_r11   | +         | 4361387 | 4364507 | <i>rrnD</i> 23S ribosomal RNA |
|             | SRO_r12   | +         | 4364581 | 4364696 | <i>rrnD</i> 5S ribosomal RNA  |
| <i>rrnE</i> | SRO_r13   | +         | 4928726 | 4930253 | <i>rrnE</i> 16S ribosomal RNA |
|             | SRO_r14   | +         | 4930538 | 4933655 | <i>rrnE</i> 23S ribosomal RNA |
|             | SRO_r15   | +         | 4933729 | 4933844 | <i>rrnE</i> 5S ribosomal RNA  |
| <i>rrnF</i> | SRO_r16   | +         | 6213883 | 6215410 | <i>rrnF</i> 16S ribosomal RNA |
|             | SRO_r17   | +         | 6215713 | 6218833 | <i>rrnF</i> 23S ribosomal RNA |
|             | SRO_r18   | +         | 6218941 | 6219056 | <i>rrnF</i> 5S ribosomal RNA  |
| <i>rrnG</i> | SRO_r19   | +         | 6677172 | 6678699 | <i>rrnG</i> 16S ribosomal RNA |
|             | SRO_r20   | +         | 6678984 | 6682103 | <i>rrnG</i> 23S ribosomal RNA |
|             | SRO_r21   | +         | 6682177 | 6682292 | <i>rrnG</i> 5S ribosomal RNA  |

**Table S3.** Lists of tRNA genes in the *S. rochei* 7434AN4 chromosome.

| No. | Locus tag | Direction | Start   | Stop    | Product     |
|-----|-----------|-----------|---------|---------|-------------|
| 1   | SRO_t01   | -         | 1233129 | 1233056 | tRNA-Pro    |
| 2   | SRO_t02   | -         | 1251754 | 1251681 | tRNA-Pro    |
| 3   | SRO_t03   | -         | 1290129 | 1290056 | tRNA-Pro    |
| 4   | SRO_t04   | -         | 1519798 | 1519711 | tRNA-Leu    |
| 5   | SRO_t05   | -         | 2388964 | 2388892 | tRNA-Thr    |
| 6   | SRO_t06   | -         | 2585963 | 2585891 | tRNA-Glu    |
| 7   | SRO_t07   | -         | 2586064 | 2585993 | tRNA-Gln    |
| 8   | SRO_t08   | -         | 2586157 | 2586082 | tRNA-Glu    |
| 9   | SRO_t09   | -         | 2586259 | 2586187 | tRNA-Glu    |
| 10  | SRO_t10   | -         | 2586352 | 2586281 | tRNA-Gln    |
| 11  | SRO_t11   | +         | 2821384 | 2821458 | tRNA-Arg    |
| 12  | SRO_t12   | -         | 2937912 | 2937839 | tRNA-Met    |
| 13  | SRO_t13   | -         | 2940126 | 2940053 | tRNA-Met    |
| 14  | SRO_t14   | -         | 3449917 | 3449842 | tRNA-Trp    |
| 15  | SRO_t15   | -         | 3459734 | 3459662 | tRNA-Met    |
| 16  | SRO_t16   | -         | 3459853 | 3459781 | tRNA-Thr    |
| 17  | SRO_t17   | -         | 3466004 | 3465923 | tRNA-Tyr    |
| 18  | SRO_t18   | -         | 3766257 | 3766184 | tRNA-Thr    |
| 19  | SRO_t19   | +         | 3819429 | 3819502 | tRNA-Pro    |
| 20  | SRO_t20   | +         | 3904972 | 3905045 | tRNA-Gly    |
| 21  | SRO_t21   | -         | 4057244 | 4057161 | tRNA-Leu    |
| 22  | SRO_t22   | -         | 4074213 | 4074141 | tRNA-Ala    |
| 23  | SRO_t23   | -         | 4087738 | 4087662 | tRNA-Ile    |
| 24  | SRO_t24   | +         | 4196100 | 4196186 | tRNA-Ser    |
| 25  | SRO_t25   | +         | 4210330 | 4210423 | tRNA-Ser    |
| 26  | SRO_t26   | +         | 4210601 | 4210673 | tRNA-Arg    |
| 27  | SRO_t27   | -         | 4234750 | 4234666 | tRNA-Ser    |
| 28  | SRO_t28   | -         | 4292090 | 4292003 | tRNA-Ser    |
| 29  | SRO_t29   | -         | 4301285 | 4301210 | tRNA-Gly    |
| 30  | SRO_t30   | -         | 4305226 | 4305151 | tRNA-Gly    |
| 31  | SRO_t31   | -         | 4318725 | 4318651 | tRNA-Asp    |
| 32  | SRO_t32   | -         | 4324459 | 4324383 | tRNA-Phe    |
| 33  | SRO_t33   | -         | 4324558 | 4324484 | tRNA-Asp    |
| 34  | SRO_t34   | -         | 4324670 | 4324598 | tRNA-Glu    |
| 35  | SRO_t35   | +         | 4331524 | 4331596 | tRNA-Lys    |
| 36  | SRO_t36   | +         | 4335773 | 4335846 | tRNA-Met    |
| 37  | SRO_t37   | +         | 4473327 | 4473403 | tRNA-Thr    |
| 38  | SRO_t38   | -         | 4685066 | 4684980 | tRNA-Arg    |
| 39  | SRO_t39   | -         | 4714739 | 4714664 | tRNA-Arg    |
| 40  | SRO_t40   | +         | 4747834 | 4747907 | tRNA-Ala    |
| 41  | SRO_t41   | -         | 4805439 | 4805365 | tRNA-Gln    |
| 42  | SRO_t42   | +         | 4848715 | 4848801 | tRNA-Leu    |
| 43  | SRO_t43   | -         | 5026162 | 5026088 | tRNA-Cys    |
| 44  | SRO_t44   | +         | 5077321 | 5077396 | tRNA-Leu    |
| 45  | SRO_t45   | -         | 5119361 | 5119285 | tRNA-Lys    |
| 46  | SRO_t46   | -         | 5123002 | 5122926 | tRNA-Lys    |
| 47  | SRO_t47   | -         | 5134228 | 5134155 | tRNA-Lys    |
| 48  | SRO_t48   | +         | 5159209 | 5159281 | tRNA-His    |
| 49  | SRO_t49   | -         | 5251955 | 5252030 | tRNA-Arg    |
| 50  | SRO_t50   | -         | 5332137 | 5332207 | tRNA-Gly    |
| 51  | SRO_t51   | +         | 5332368 | 5332444 | tRNA-Pro    |
| 52  | SRO_t52   | +         | 5380478 | 5380550 | tRNA-Ala    |
| 53  | SRO_t53   | +         | 5381043 | 5381115 | tRNA-Ala    |
| 54  | SRO_t54   | +         | 5519029 | 5519101 | tRNA-Asn    |
| 55  | SRO_t55   | +         | 5519108 | 5519180 | tRNA-Asn    |
| 56  | SRO_t56   | +         | 5519357 | 5519433 | tRNA-Met    |
| 57  | SRO_t57   | +         | 5604508 | 5604582 | tRNA-Val    |
| 58  | SRO_t58   | -         | 5998716 | 5998642 | tRNA-Leu    |
| 59  | SRO_t59   | -         | 6342850 | 6342763 | tRNA-Leu    |
| 60  | SRO_t60   | -         | 6490851 | 6490780 | tRNA-Val    |
| 61  | SRO_t61   | -         | 6490973 | 6490902 | tRNA-Val    |
| 62  | SRO_t62   | -         | 6491048 | 6490975 | tRNA-Cys    |
| 63  | SRO_t63   | -         | 6491159 | 6491084 | tRNA-Gly    |
| 64  | SRO_t64   | +         | 6497885 | 6497959 | tRNA-Val    |
| 65  | SRO_t65   | +         | 6498710 | 6498784 | tRNA-Val    |
| 66  | SRO_t66   | +         | 7005118 | 7005191 | tRNA-Met    |
| 67  | SRO_t67   | -         | 7486065 | 7485974 | tRNA-SeC(p) |

**Table S4.** List of TTA codon-containing ORFs in the *S. rochei* chromosome.

| SRO locus <sup>a</sup> | note | Coding region                | Putative function                                                              |
|------------------------|------|------------------------------|--------------------------------------------------------------------------------|
| SRO_0031               |      | 28575..28964                 | TATA-binding protein associated factor Taf2                                    |
| SRO_0056               |      | 54516..54824                 | Protein-L-isoaspartate O-methyltransferase 2                                   |
| SRO_0065               |      | 62715..65615                 | Tetratricopeptide TPR_1 repeat-containing protein                              |
| SRO_0068               |      | 66968..67576                 | ATP-dependint DNA ligase                                                       |
| SRO_0087               |      | complement(80551..81438)     | Uncharacterized protein                                                        |
| SRO_0093               |      | complement(85415..85978)     | IS transposase                                                                 |
| SRO_0096               |      | 86675..87073                 | IS1647-like transposase                                                        |
| SRO_0101               |      | 90575..90925                 | Uncharacterized protein                                                        |
| SRO_0106               |      | 93120..93563                 | IS1647-like transposase                                                        |
| SRO_0113               |      | 98942..99430                 | Uncharacterized protein                                                        |
| SRO_0148               |      | 123685..124008               | Putative transposase                                                           |
| SRO_0156               |      | 131060..134476               | Non-ribosomal peptide synthetase/polyketide synthase domain-containing protein |
| SRO_0159               |      | complement(144169..144543)   | Uncharacterized protein                                                        |
| SRO_0160               |      | 144974..145678               | Peptide synthetase                                                             |
| SRO_0161               |      | 145675..146946               | Amine oxidase                                                                  |
| SRO_0162               |      | 146950..147747               | Imidazole glycerol phosphate synthase subunit HisF                             |
| SRO_0164               |      | 148813..151926               | Amino acid adenylation domain-containing protein                               |
| SRO_0167               |      | 153886..157014               | Thioester reductase domain protein                                             |
| SRO_0197               |      | 177519..177884               | TnpA family transposase                                                        |
| SRO_0202               |      | 182219..183118               | phytanoyl-CoA dioxygenase                                                      |
| SRO_0208               |      | complement(187685..189526)   | Radical SAM domain protein                                                     |
| SRO_0210               |      | 190859..191668               | Uncharacterized protein                                                        |
| SRO_0211               |      | 191665..192450               | Putative membrane protein                                                      |
| SRO_0243               |      | 218132..218743               | Uncharacterized protein                                                        |
| SRO_0246               |      | 223271..223645               | Uncharacterized protein                                                        |
| SRO_0252               |      | 227014..227313               | Putative uncharacterized protein                                               |
| SRO_0264               |      | complement(235863..237299)   | Putative uncharacterized protein                                               |
| SRO_0272               |      | complement(243816..245051)   | transposase IS4 family protein                                                 |
| SRO_0325               |      | 299825..300424               | predicted protein                                                              |
| SRO_0326               |      | 300546..300998               | IS transposase                                                                 |
| SRO_0337               |      | complement(315477..316799)   | Glutamate-1-semialdehyde aminotransferase                                      |
| SRO_0338               |      | complement(316964..318388)   | Tryptophan 2,3-dioxygenase                                                     |
| SRO_0396               |      | complement(383036..384076)   | response regulator receiver protein                                            |
| SRO_0397               |      | 384376..385749               | l-amino acid ligase                                                            |
| SRO_0409               |      | 396388..397188               | Uncharacterized protein                                                        |
| SRO_0414               |      | 400822..403530               | Putative regulatory protein AfsR                                               |
| SRO_0424               |      | 414050..415345               | antibiotic transport protein                                                   |
| SRO_0447               |      | 435097..435747               | RNA polymerase sigma-70 factor, sigma-E family                                 |
| SRO_0494               |      | complement(480603..480830)   | Uncharacterized protein                                                        |
| SRO_0550               |      | complement(565618..567453)   | glycoside hydrolase family protein                                             |
| SRO_0650               |      | 686010..688838               | secreted protein                                                               |
| SRO_0707               |      | complement(753212..754153)   | myo-inositol 1-monophosphatase                                                 |
| SRO_0732               |      | 775656..776525               | SARP family transcriptional regulator                                          |
| SRO_0738               |      | 786598..788064               | TMC biosynthetic enzyme R4                                                     |
| SRO_0768               |      | complement(813595..814479)   | Uncharacterized protein                                                        |
| SRO_0800               |      | complement(846636..847130)   | Uncharacterized protein                                                        |
| SRO_0807               |      | complement(851457..851726)   | Uncharacterized protein                                                        |
| SRO_0819               |      | complement(863748..865973)   | serine/threonine protein kinase                                                |
| SRO_0820               |      | 866347..867090               | Uncharacterized protein                                                        |
| SRO_0875               |      | complement(942433..943428)   | LacI-family transcriptional regulator                                          |
| SRO_0937               |      | complement(1020560..1026541) | Putative DEAD/DEAH box helicase                                                |
| SRO_0940               |      | complement(1029169..1033725) | Uncharacterized protein                                                        |
| SRO_0942               |      | 1034680..1037622             | Type III restriction enzyme, res subunit                                       |
| SRO_0945               |      | 1042188..1043366             | Uncharacterized protein                                                        |
| SRO_0990               |      | 1088539..1088982             | IS1647-like transposase                                                        |
| SRO_0999               |      | complement(1100356..1101135) | branched-chain amino acid ABC transporter permease protein                     |

|          |                              |                                                                                  |
|----------|------------------------------|----------------------------------------------------------------------------------|
| SRO_1047 | 1163380..1164456             | Uncharacterized protein                                                          |
| SRO_1077 | complement(1196222..1196614) | Uncharacterized protein                                                          |
| SRO_1107 | 1231842..1232918             | two-component system response regulator                                          |
| SRO_1143 | 1266964..1268187             | Putative uncharacterized protein                                                 |
| SRO_1150 | 1273894..1275378             | Uncharacterized protein                                                          |
| SRO_1151 | 1275652..1279617             | NB-ARC domain-containing protein                                                 |
| SRO_1152 | complement(1279687..1281348) | Uncharacterized protein                                                          |
| SRO_1189 | complement(1323183..1324307) | Uncharacterized protein                                                          |
| SRO_1313 | complement(1454019..1455086) | Putative uncharacterized protein                                                 |
| SRO_1319 | 1463250..1465532             | Non-ribosomal peptide synthetase                                                 |
| SRO_1321 | 1468741..1469994             | major facilitator MFS1 protein                                                   |
| SRO_1422 | complement(1588884..1589468) | adenylosuccinate lyase                                                           |
| SRO_1441 | complement(1609353..1609736) | Uncharacterized protein                                                          |
| SRO_1443 | complement(1610569..1611759) | ATP-binding region ATPase domain-containing protein                              |
| SRO_1494 | complement(1676363..1676680) | Diguanylate cyclase (Precursor)                                                  |
| SRO_1520 | complement(1701947..1702231) | CagE, TrbE, VirB component of type IV transporter system, conserved region       |
| SRO_1545 | complement(1730267..1730584) | Putative uncharacterized protein                                                 |
| SRO_1564 | 1764539..1767568             | AfsR-like transcriptional regulator                                              |
| SRO_1581 | complement(1781850..1782716) | transcriptional regulator                                                        |
| SRO_1651 | complement(1867888..1869678) | Uncharacterized protein                                                          |
| SRO_1739 | complement(1970660..1971304) | A-factor receptor-like protein                                                   |
| SRO_1761 | complement(1989927..1990805) | ABC transporter ATP-binding protein                                              |
| SRO_1780 | complement(2012655..2014691) | 1-deoxy-D-xylulose-5-phosphate synthase                                          |
| SRO_1874 | complement(2122499..2122999) | Uncharacterized protein                                                          |
| SRO_1876 | complement(2123498..2124673) | bldA-regulated nucleotide binding protein                                        |
| SRO_1893 | complement(2149122..2153210) | Uncharacterized protein                                                          |
| SRO_1894 | complement(2153215..2154624) | Putative uncharacterized protein                                                 |
| SRO_1911 | complement(2169819..2172329) | LPXTG-motif cell wall anchor domain-containing protein                           |
| SRO_1912 | 2172419..2173327             | Uncharacterized protein                                                          |
| SRO_1914 | 2175047..2175997             | iron-dependent peroxidase                                                        |
| SRO_1948 | 2207053..2209872             | helicase                                                                         |
| SRO_2013 | complement(2280696..2282915) | ABC transporter                                                                  |
| SRO_2024 | complement(2292635..2294083) | drug resistance efflux protein                                                   |
| SRO_2050 | complement(2326138..2326770) | Putative uncharacterized protein Sb08g019850                                     |
| SRO_2278 | 2589550..2589864             | Putative 2-keto-4-pentenoate hydratase/2-oxohepta-3-ene-1,7-dioic acid hydratase |
| SRO_2334 | complement(2655136..2657472) | phosphodiesterase                                                                |
| SRO_2489 | complement(2821956..2822219) | NERD domain-containing protein                                                   |
| SRO_2546 | 2882699..2886346             | 2-oxoglutarate decarboxylase                                                     |
| SRO_2714 | 3064322..3065104             | integral membrane protein                                                        |
| SRO_2726 | 3079076..3079483             | Uncharacterized protein                                                          |
| SRO_2746 | 3102859..3104952             | magnesium or manganese-dependent protein phosphatase                             |
| SRO_2775 | complement(3132173..3132970) | Hypothetical protein                                                             |
| SRO_2934 | 3298711..3300228             | serine/threonine protein kinase                                                  |
| SRO_3063 | 3430240..3430905             | crp/FNR family transcriptional regulator                                         |
| SRO_3163 | complement(3534658..3537678) | transcriptional regulator, SARP family protein                                   |
| SRO_3189 | 3558233..3560317             | Uncharacterized protein                                                          |
| SRO_3203 | complement(3574121..3576106) | Uncharacterized protein                                                          |
| SRO_3204 | complement(3576103..3577281) | hydrolase                                                                        |
| SRO_3230 | 3597167..3598360             | secreted serine-rich protein                                                     |
| SRO_3249 | 3618058..3619149             | secreted cellulose binding protein                                               |
| SRO_3253 | 3621067..3621993             | xre family toxin-antitoxin system, antitoxin component                           |
| SRO_3300 | complement(3676721..3677020) | Acriflavin resistance protein                                                    |
| SRO_3302 | 3677837..3678439             | Uncharacterized protein                                                          |
| SRO_3343 | 3721791..3722267             | regulator                                                                        |
| SRO_3354 | complement(3734747..3735931) | secreted hydrolase                                                               |

|          |                              |                                                           |
|----------|------------------------------|-----------------------------------------------------------|
| SRO_3364 | 3746077..3747000             | Transcriptional regulator                                 |
| SRO_3379 | 3762114..3763352             | ISXo8 transposase                                         |
| SRO_3381 | complement(3764448..3765092) | transcriptional regulator                                 |
| SRO_3398 | complement(3788305..3789174) | integral membrane protein                                 |
| SRO_3498 | complement(3898105..3899181) | glycosyl transferase family protein                       |
| SRO_3520 | complement(3922922..3923947) | membrane transport protein                                |
| SRO_3532 | 3935166..3935630             | Putative uncharacterized protein                          |
| SRO_3534 | complement(3939138..3940505) | LigA protein                                              |
| SRO_3539 | 3943563..3946601             | Uncharacterized protein                                   |
| SRO_3540 | complement(3946929..3947657) | Uncharacterized protein                                   |
| SRO_3600 | 4019739..4020731             | phosphotransferase enzyme family protein                  |
| SRO_3631 | 4053056..4054105             | Putative LuxR family regulator                            |
| SRO_3635 | 4055677..4056495             | Uncharacterized protein                                   |
| SRO_3778 | 4210861..4211277             | integral membrane protein                                 |
| SRO_3815 | 4247762..4248793             | Uncharacterized protein                                   |
| SRO_3838 | 4265139..4265552             | Uncharacterized protein                                   |
| SRO_3840 | complement(4266363..4267880) | Putative restriction endonuclease                         |
| SRO_3842 | complement(4269596..4271776) | Regulatory protein MerR                                   |
| SRO_3843 | complement(4271871..4272068) | Uncharacterized protein                                   |
| SRO_3850 | complement(4279320..4280165) | regulatory protein                                        |
| SRO_3851 | 4280399..4281652             | Uncharacterized protein                                   |
| SRO_3934 | 4388838..4389038             | predicted protein                                         |
| SRO_3966 | complement(4412655..4413497) | DNA-binding protein                                       |
| SRO_4002 | complement(4443156..4444259) | methylase of polypeptide chain release factors            |
| SRO_4120 | complement(4556184..4556771) | predicted protein                                         |
| SRO_4163 | 4603167..4603583             | Serine phosphatase                                        |
| SRO_4180 | complement(4619818..4622037) | pimeloyl-CoA synthetase                                   |
| SRO_4233 | 4683282..4684931             | PAS sensor protein                                        |
| SRO_4238 | complement(4689382..4690725) | tetratricopeptide TPR-2                                   |
| SRO_4264 | 4712621..4712935             | predicted protein                                         |
| SRO_4280 | complement(4727752..4728498) | Hypothetical protein                                      |
| SRO_4398 | complement(4856196..4857233) | XRE family transcriptional regulator                      |
| SRO_4406 | complement(4859535..4860188) | Putative Carbonic anhydrase                               |
| SRO_4414 | complement(4864644..4865519) | Uncharacterized protein                                   |
| SRO_4510 | complement(4982812..4985061) | glycosyl transferase                                      |
| SRO_4545 | 5031562..5032836             | Uncharacterized protein                                   |
| SRO_4546 | 5032985..5034454             | transmembrane transport protein                           |
| SRO_4585 | complement(5069614..5071320) | integral membrane protein                                 |
| SRO_4602 | complement(5085565..5086752) | O-methyltransferase                                       |
| SRO_4616 | complement(5094415..5095371) | Putative restriction endonuclease                         |
| SRO_4703 | complement(5185607..5186050) | ATPase/histidine kinase/DNA gyrase B/HSP90 domain protein |
| SRO_4735 | complement(5218914..5219807) | Uncharacterized protein                                   |
| SRO_4811 | 5301900..5302631             | Crp/Fnr family transcriptional regulator                  |
| SRO_4817 | complement(5310279..5311301) | D-isomer specific 2-hydroxyacid dehydrogenase             |
| SRO_4855 | complement(5354055..5354399) | Dyp-type peroxidase family (Precursor)                    |
| SRO_4961 | complement(5465769..5467709) | amylo-alpha-1,6-glucosidase                               |
| SRO_4968 | 5476131..5477231             | predicted protein                                         |
| SRO_4970 | complement(5478207..5478440) | Ankyrin repeat domain-containing protein 13C (Fragment)   |
| SRO_4975 | complement(5485702..5486019) | IS transposase                                            |
| SRO_4982 | 5489969..5491333             | plasmid transfer protein                                  |
| SRO_4990 | 5494555..5495928             | integrase                                                 |
| SRO_4992 | 5496844..5497710             | NERD domain-containing protein                            |
| SRO_5018 | complement(5530176..5532065) | Uncharacterized protein                                   |
| SRO_5027 | 5542510..5546037             | Putative fatty-acid-CoA ligase FADD9                      |
| SRO_5039 | 5557310..5558470             | beta-lactamase class C                                    |
| SRO_5155 | 5673250..5674470             | Major facilitator superfamily MFS_1                       |
| SRO_5210 | complement(5723604..5724620) | AraC-family transcriptional regulator                     |
| SRO_5232 | 5741605..5742666             | Uncharacterized protein                                   |
| SRO_5452 | complement(5981738..5982589) | coenzyme A transferase                                    |



|          |       |                              |                                                      |
|----------|-------|------------------------------|------------------------------------------------------|
| SRO_5453 |       | complement(5982590..5983342) | enoyl-CoA hydratase                                  |
| SRO_5496 |       | complement(6031213..6032124) | regulatory protein                                   |
| SRO_5513 |       | complement(6049963..6050292) | Putative uncharacterized protein                     |
| SRO_5526 |       | complement(6063244..6064467) | LacI-family transcriptional regulator                |
| SRO_5548 |       | 6088987..6089733             | nucleotidyltransferase domain-containing protein     |
| SRO_5728 |       | 6275740..6277503             | FMNH2-utilizing oxygenase                            |
| SRO_5730 |       | complement(6298975..6299349) | Uncharacterized protein                              |
| SRO_5752 |       | 6300917..6301303             | Hypothetical protein                                 |
| SRO_5869 |       | 6425080..6426210             | two-component system sensor kinase                   |
| SRO_5875 |       | 6432881..6433417             | NUDIX hydrolase                                      |
| SRO_5876 |       | complement(6433444..6433704) | Uncharacterized protein                              |
| SRO_5918 |       | 6474454..6475170             | phosphatase                                          |
| SRO_5961 |       | complement(6519332..6519565) | Uncharacterized protein                              |
| SRO_6015 |       | 6580732..6582162             | amino acid permease                                  |
| SRO_6047 |       | 6615254..6616210             | Uncharacterized protein                              |
| SRO_6166 |       | 6745230..6752147             | beta-ketoacyl synthase                               |
| SRO_6224 |       | complement(6811730..6812593) | DNA-binding protein                                  |
| SRO_6316 |       | complement(6948174..6949532) | Albicidin efflux pump transmembrane protein          |
| SRO_6344 |       | complement(6980312..6981268) | Helix-turn-helix motif                               |
| SRO_6394 |       | complement(7037379..7038863) | amino acid permease related protein                  |
| SRO_6449 |       | complement(7100665..7101600) | integral membrane protein                            |
| SRO_6451 |       | 7102800..7104236             | 2-polyprenyl-6-methoxyphenol 4-hydroxylase           |
| SRO_6585 |       | 7231755..7232720             | secreted protein                                     |
| SRO_6665 |       | complement(7347121..7348578) | magnesium or manganese-dependent protein phosphatase |
| SRO_6793 |       | 7478656..7479900             | Membrane protein                                     |
| SRO_6877 |       | complement(7562998..7563945) | peptidase M48 Ste24p                                 |
| SRO_6926 |       | complement(7612191..7612562) | Tat pathway signal sequence domain protein           |
| SRO_6927 |       | complement(7612690..7613886) | Uncharacterized protein                              |
| SRO_6946 |       | 7632381..7633031             | tetracycline repressor                               |
| SRO_6947 |       | 7633107..7633274             | Uncharacterized protein                              |
| SRO_6999 |       | complement(7684079..7684819) | beta-glucanase/beta-glucan synthetase                |
| SRO_7003 |       | complement(7688884..7690467) | peptidase                                            |
| SRO_7017 |       | complement(7706054..7707058) | Uncharacterized protein                              |
| SRO_7038 |       | complement(7728285..7729007) | transcriptional regulatory protein degU              |
| SRO_7094 |       | complement(7775663..7777999) | Serine/threonine protein kinase                      |
| SRO_7097 |       | complement(7780980..7781756) | undecaprenyl pyrophosphate synthetase                |
| SRO_7121 |       | 7811892..7812257             | acetyltransferase                                    |
| SRO_7146 |       | 7836104..7837561             | cytochrome P450                                      |
| SRO_7147 |       | 7837677..7839254             | Uncharacterized protein                              |
| SRO_7191 |       | complement(7883722..7885692) | ABC transporter ATP-binding protein                  |
| SRO_7209 |       | 7902460..7903668             | cytochrome P450                                      |
| SRO_7210 |       | 7903771..7905123             | alpha/beta hydrolase MppK                            |
| SRO_7211 |       | 7905650..7924645             | non-ribosomal peptide synthase                       |
| SRO_7215 |       | 7946023..7947273             | Major facilitator transporter                        |
| SRO_7223 | PemA1 | 7953542..7976965             | polyketide synthase                                  |
| SRO_7224 | PemA2 | 7977037..7987833             | polyketide synthase                                  |
| SRO_7227 | PemA5 | 8011881..8021942             | modular polyketide synthase                          |
| SRO_7229 | PemC  | 8023302..8024501             | cytochrome P450 hydroxylase                          |
| SRO_7232 | PemR  | complement(8026047..8029616) | DnrI/RedD/AfsR family transcriptional regulator      |
| SRO_7360 |       | complement(8170735..8170920) | ABC transporter related protein                      |
| SRO_7366 |       | complement(8176948..8177943) | Thymidylate synthase                                 |
| SRO_7408 |       | 8219243..8219968             | Uncharacterized protein                              |
| SRO_7481 |       | complement(8283208..8283432) | AraC family transcriptional regulator                |
| SRO_7511 |       | complement(8307432..8307665) | Lipopolysaccharide biosynthesis protein              |
| SRO_7538 |       | complement(8335839..8336228) | TATA-binding protein associated factor Taf2          |

<sup>a</sup> Yellow highlights indicate TTA codon-containing ORFs possibly involved in secondary metabolite biosynthesis.

**Table S5.** TTA-containing ORFs in the *S. rochei* chromosome classified by their occurrence in other *Streptomyces* species.

| Occurrence in <i>Streptomyces</i>                                                                         | SRO number                                                                                                                                                                                                                                                                                                                                                                                                                                                                                                                                                                                                                                                                                                                                                                                                                                                                                                                                                                                                                                                                                                                         | Total |
|-----------------------------------------------------------------------------------------------------------|------------------------------------------------------------------------------------------------------------------------------------------------------------------------------------------------------------------------------------------------------------------------------------------------------------------------------------------------------------------------------------------------------------------------------------------------------------------------------------------------------------------------------------------------------------------------------------------------------------------------------------------------------------------------------------------------------------------------------------------------------------------------------------------------------------------------------------------------------------------------------------------------------------------------------------------------------------------------------------------------------------------------------------------------------------------------------------------------------------------------------------|-------|
| Present only in <i>S. rochei</i> 7434AN4                                                                  | 0031, 0056, 0065, 0068, 0087, 0101, 0113, 0148, 0156, 0159, 0160, 0161, 0162, 0164, 0167, 0197, 0202, 0208, 0210, 0211, 0243, 0246, 0252, 0264, 0272, 0337, 0338, 0396, 0397, 0409, 0414, 0424, 0447, 0494, 0550, 0650, 0732, 0738, 0768, 0800, 0807, 0819, 0820, 0875, 0937, 0940, 0942, 0945, 0999, 1047, 1077, 1107, 1143, 1150, 1151, 1152, 1189, 1313, 1319, 1321, 1441, 1443, 1494, 1520, 1545, 1564, 1761, 1874, 1876, 1893, 1894, 1911, 1912, 1948, 2013, 2024, 2050, 2278, 2489, 2714, 2726, 2746, 2775, 2934, 3063, 3163, 3189, 3253, 3300, 3302, 3354, 3364, 3379, 3381, 3498, 3520, 3532, 3534, 3539, 3540, 3600, 3631, 3635, 3778, 3815, 3838, 3840, 3842, 3843, 3850, 3934, 3966, 4120, 4163, 4233, 4238, 4280, 4398, 4406, 4414, 4545, 4546, 4585, 4602, 4616, 4703, 4735, 4811, 4817, 4855, 4968, 4970, 4990, 4992, 5018, 5027, 5039, 5155, 5210, 5232, 5452, 5453, 5496, 5513, 5526, 5548, 5728, 5730, 5875, 5918, 6166, 6316, 6344, 6394, 6449, 6451, 6585, 6793, 6877, 6926, 6927, 6946, 6947, 6999, 7003, 7017, 7038, 7094, 7097, 7121, 7146, 7147, 7191, 7215, 7224, 7229, 7360, 7366, 7408, 7481, 7511, 7538 | 182   |
| Shared with <i>S. hygrosopicus</i> only                                                                   | 0096, 0326, 1422, 1651, 1739, 1914, 3203, 3204, 3230, 4002, 4961, 4982, 5876, 6665, 7209, 7210, 7211, 7232.                                                                                                                                                                                                                                                                                                                                                                                                                                                                                                                                                                                                                                                                                                                                                                                                                                                                                                                                                                                                                        | 18    |
| Shared with <i>S. avermitilis</i> only                                                                    | 4510, 6047, 7223, 7227                                                                                                                                                                                                                                                                                                                                                                                                                                                                                                                                                                                                                                                                                                                                                                                                                                                                                                                                                                                                                                                                                                             | 4     |
| Shared with <i>S. griseus</i> only                                                                        | 3249, 3851, 4180                                                                                                                                                                                                                                                                                                                                                                                                                                                                                                                                                                                                                                                                                                                                                                                                                                                                                                                                                                                                                                                                                                                   | 3     |
| Shared with <i>S. scabiei</i> only                                                                        | 3343, 3398, 4264                                                                                                                                                                                                                                                                                                                                                                                                                                                                                                                                                                                                                                                                                                                                                                                                                                                                                                                                                                                                                                                                                                                   | 3     |
| Shared with <i>S. hygrosopicus</i> , and <i>S. avermitilis</i>                                            | 0106, 0990                                                                                                                                                                                                                                                                                                                                                                                                                                                                                                                                                                                                                                                                                                                                                                                                                                                                                                                                                                                                                                                                                                                         | 2     |
| Shared with <i>S. hygrosopicus</i> , and <i>S. scabiei</i>                                                | 0325, 4975                                                                                                                                                                                                                                                                                                                                                                                                                                                                                                                                                                                                                                                                                                                                                                                                                                                                                                                                                                                                                                                                                                                         | 2     |
| Shared with <i>S. hygrosopicus</i> , and <i>S. coelicolor</i>                                             | 5961                                                                                                                                                                                                                                                                                                                                                                                                                                                                                                                                                                                                                                                                                                                                                                                                                                                                                                                                                                                                                                                                                                                               | 1     |
| Shared with <i>S. avermitilis</i> , and <i>S. scabiei</i>                                                 | 0707, 6015                                                                                                                                                                                                                                                                                                                                                                                                                                                                                                                                                                                                                                                                                                                                                                                                                                                                                                                                                                                                                                                                                                                         | 2     |
| Shared with <i>S. griseus</i> , and <i>S. scabiei</i>                                                     | 5869                                                                                                                                                                                                                                                                                                                                                                                                                                                                                                                                                                                                                                                                                                                                                                                                                                                                                                                                                                                                                                                                                                                               | 1     |
| Shared with <i>S. hygrosopicus</i> , <i>S. avermitilis</i> , and <i>S. coelicolor</i>                     | 93                                                                                                                                                                                                                                                                                                                                                                                                                                                                                                                                                                                                                                                                                                                                                                                                                                                                                                                                                                                                                                                                                                                                 | 1     |
| Shared with <i>S. hygrosopicus</i> , <i>S. avermitilis</i> , and <i>S. scabiei</i>                        | 2546                                                                                                                                                                                                                                                                                                                                                                                                                                                                                                                                                                                                                                                                                                                                                                                                                                                                                                                                                                                                                                                                                                                               | 1     |
| Shared with <i>S. hygrosopicus</i> , <i>S. coelicolor</i> , and <i>S. scabiei</i>                         | 1780, 6224                                                                                                                                                                                                                                                                                                                                                                                                                                                                                                                                                                                                                                                                                                                                                                                                                                                                                                                                                                                                                                                                                                                         | 2     |
| Shared with <i>S. hygrosopicus</i> , <i>S. avermitilis</i> , <i>S. coelicolor</i> , and <i>S. scabiei</i> | 2334, 5752                                                                                                                                                                                                                                                                                                                                                                                                                                                                                                                                                                                                                                                                                                                                                                                                                                                                                                                                                                                                                                                                                                                         | 2     |
| Common in all five strains                                                                                | 1581                                                                                                                                                                                                                                                                                                                                                                                                                                                                                                                                                                                                                                                                                                                                                                                                                                                                                                                                                                                                                                                                                                                               | 1     |

**Table S6.** Protein families in *S. rochei* 7434AN4 and other four completely sequenced *Streptomyces*.

| Family                                 | SRO        | SHJG       | SCO        | SAV        | SGR        |
|----------------------------------------|------------|------------|------------|------------|------------|
| RNA polymerase ECF sigma factor        | 21 (0.28)  | 41 (0.46)  | 46 (0.59)  | 42 (0.55)  | 31 (0.43)  |
| RNA polymerase sigma factor            | 36 (0.48)  | 13 (0.15)  | 14 (0.18)  | 13 (0.17)  | 13 (0.18)  |
| Two-component response regulator       | 95 (1.26)  | 72 (0.81)  | 84 (1.07)  | 72 (0.95)  | 74 (1.04)  |
| Two-component histidine kinase (1)     | 113 (1.49) | 27 (0.31)  | 44 (0.56)  | 28 (0.37)  | 31 (0.43)  |
| Two-component histidine kinase (2)     |            | 20 (0.23)  | 23 (0.29)  | 25 (0.33)  | 23 (0.32)  |
| Serine/threonine protein kinase        | 62 (0.82)  | 31 (0.35)  | 26 (0.33)  | 26 (0.34)  | 24 (0.34)  |
| Mg or Mn-dependent protein phosphatase | 50 (0.66)  | 54 (0.61)  | 41 (0.52)  | 41 (0.54)  | 35 (0.49)  |
| TetR-family transcriptional regulator  | 110 (1.45) | 131 (1.48) | 133 (1.70) | 104 (1.37) | 97 (1.36)  |
| MarR-family transcriptional regulator  | 48 (0.63)  | 47 (0.53)  | 41 (0.52)  | 34 (0.45)  | 33 (0.46)  |
| GntR-family transcriptional regulator  | 41 (0.54)  | 38 (0.43)  | 41 (0.52)  | 35 (0.46)  | 28 (0.39)  |
| LacI-family transcriptional regulator  | 18 (0.24)  | 29 (0.33)  | 36 (0.46)  | 28 (0.37)  | 23 (0.32)  |
| LysR-family transcriptional regulator  | 39 (0.52)  | 37 (0.42)  | 40 (0.51)  | 29 (0.38)  | 25 (0.35)  |
| AraC-family transcriptional regulator  | 34 (0.45)  | 35 (0.40)  | 26 (0.33)  | 24 (0.32)  | 22 (0.31)  |
| ROK-family transcriptional regulator   | 16 (0.21)  | 22 (0.25)  | 27 (0.35)  | 22 (0.29)  | 16 (0.22)  |
| IclR-family transcriptional regulator  | 9 (0.12)   | 16 (0.18)  | 16 (0.20)  | 11 (0.15)  | 14 (0.20)  |
| AsnC-family transcriptional regulator  | 16 (0.21)  | 12 (0.14)  | 13 (0.17)  | 13 (0.17)  | 10 (0.14)  |
| DNA-binding protein                    | 52 (0.69)  | 16 (0.18)  | 24 (0.31)  | 26 (0.34)  | 19 (0.27)  |
| ABC transporter ATP-binding protein    | 153 (2.02) | 114 (1.29) | 133 (1.70) | 134 (1.77) | 162 (2.27) |
| ABC transporter permease protein       | 156 (2.06) | 72 (0.81)  | 83 (1.06)  | 74 (0.98)  | 53 (0.74)  |
| ABC transporter sugar-binding protein  | 29 (0.38)  | 16 (0.18)  | 16 (0.20)  | 14 (0.18)  | 13 (0.18)  |
| MFS-family transporter                 | 152 (2.01) | 132 (1.49) | 99 (1.27)  | 88 (1.16)  | 97 (1.36)  |
| Short chain dehydrogenase              | 79 (1.04)  | 103 (1.16) | 81 (1.04)  | 73 (0.96)  | 57 (0.80)  |
| Alpha/beta hydrolase                   | 76 (1.00)  | 46 (0.52)  | 35 (0.45)  | 38 (0.50)  | 28 (0.39)  |
| Cytochrome P450                        | 42 (0.55)  | 34 (0.38)  | 18 (0.23)  | 32 (0.42)  | 27 (0.38)  |
| Zn-dependent dehydrogenase             | 44 (0.58)  | 59 (0.67)  | 37 (0.47)  | 44 (0.58)  | 27 (0.38)  |
| Aldehyde dehydrogenase                 | 25 (0.33)  | 30 (0.34)  | 21 (0.27)  | 23 (0.30)  | 22 (0.31)  |
| Acyl-CoA synthetase                    | 46 (0.61)  | 46 (0.52)  | 25 (0.32)  | 40 (0.53)  | 37 (0.52)  |
| Acyl-CoA dehydrogenase                 | 38 (0.50)  | 17 (0.19)  | 18 (0.23)  | 25 (0.33)  | 27 (0.38)  |
| Luciferase family monooxygenase        | 30 (0.40)  | 33 (0.37)  | 14 (0.18)  | 26 (0.34)  | 20 (0.28)  |
| FAD-dependent monooxygenase            | 24 (0.32)  | 24 (0.27)  | 22 (0.28)  | 13 (0.17)  | 12 (0.17)  |
| Aldo/keto reductase                    | 29 (0.38)  | 29 (0.33)  | 25 (0.32)  | 21 (0.28)  | 19 (0.27)  |
| Methyltransferase                      | 135 (1.78) | 23 (0.26)  | 21 (0.27)  | 24 (0.32)  | 27 (0.38)  |
| Enoyl-CoA hydratase                    | 18 (0.24)  | 13 (0.15)  | 8 (0.10)   | 16 (0.21)  | 14 (0.20)  |
| Aminotransferase                       | 61 (0.81)  | 17 (0.19)  | 16 (0.20)  | 14 (0.18)  | 14 (0.20)  |

Numbers indicate annotated protein families on the basis of BLASTP search. Parenthesis indicates percentage of families in their genome. Data for four reference strains was cited from Ref. 19 [Wu, *et al.*, *BMC Genomics* **13**, 337 (2012)]. SRO, *S. rochei* 7434AN4; SHJG, *S. hygroscopicus* 5008; SCO, *S. coelicolor* A3(2); SAV, *S. avermitilis* MA-4680; SGR, *S. griseus* IFO13350.

**Table S7.** Location of CRISPR-associate (*cas*) genes and CRISPR repeats in the *S. rochei* chromosome.

|                   | Locus tag | Positions               | Functions                                         |
|-------------------|-----------|-------------------------|---------------------------------------------------|
| CRISPR repeats #1 |           | 2,205,703 ... 2,206,837 | CRISPR repeat sequences                           |
| <i>cas</i> genes  | SRO_1948  | 2,207,053 ... 2,209,872 | CRISPR-associated helicase/endonuclease Cas3      |
|                   | SRO_1949  | 2,210,208 ... 2,211,800 | CRISPR-associated protein, Cse1 family            |
|                   | SRO_1950  | 2,211,867 ... 2,212,598 | Type I-E CRISPR-associated protein Cse2/CasB      |
|                   | SRO_1951  | 2,212,668 ... 2,213,861 | Type I-E CRISPR-associated protein Cas7/Cse4/CasC |
|                   | SRO_1952  | 2,213,858 ... 2,214,733 | Type I-E CRISPR-associated protein Cas5/CasD      |
|                   | SRO_1953  | 2,214,730 ... 2,215,422 | Type I-E CRISPR-associated protein Cas6/Cse3/CasE |
|                   | SRO_1954  | 2,215,419 ... 2,216,408 | Type I-E CRISPR-associated endonuclease Cas1      |
|                   | SRO_1955  | 2,216,433 ... 2,216,750 | Type I-E CRISPR-associated endoribonuclease Cas2  |
| CRISPR repeats #2 |           | 2,216,850 ... 2,217,182 | CRISPR repeat sequences                           |

**Table S8.** Sequences of CRISPR repeats in the *S. rochei* chromosome.

| No.                                         | Start position | 5'-3' Sequences (DR Consensus sequence: <b>CGGTTACCTCCGCCTGCGCGGAGCGGAC</b> )    |
|---------------------------------------------|----------------|----------------------------------------------------------------------------------|
| CRISPR repeat #1 (nt 2,205,703 – 2,206,837) |                |                                                                                  |
| 1                                           | 2,205,703      | <b>AATCGCACCTCCGCCTGCGCAGAGCGGAC</b> TCCAGGTCGGCCCGGTGCACCCC                     |
| 2                                           | 2,205,755      | <b>CGGCTCACCTCCGCCTGCGCGGAGCGGAC</b> ACGACTGGACCGAGCCGCCCTGGTTCTGCTCGCAGATCT     |
| 3                                           | 2,205,823      | <b>CGGTTACCTCCGCCTGCGCGGAGCGGAC</b> TCCAGCTCTTCGCGGGCGGTCTCGCGTACCTC             |
| 4                                           | 2,205,884      | <b>CGGTTACCTCCGCCTGCGCGGAGCGGAC</b> TCACCCCGCGACTGACCAGGTGGCCTCGT                |
| 5                                           | 2,205,943      | <b>GGCGGTTACCCGCCTGCGCGGAGCGGAC</b> CCGTCCGGGAGCTGCGTCGCCAGCACCAGCGC             |
| 6                                           | 2,206,004      | <b>CGGTTACCTCCGCCTGCGCGGAGCGGAC</b> AGCTCGGGCGACATGAGCGGGTACTCGGCATC             |
| 7                                           | 2,206,065      | <b>CGGTTACCTCCGCCTGCGCGGAGCGGAC</b> GGGGTGCCGGTGCCGGTGCCGGTGACGTTGGCCCTTGCCCGGTT |
| 8                                           | 2,206,138      | <b>CGGTTACCTCCGCCTGCGCGGAGCGGAC</b> GTCATCACCCGATTCTCCCGGTGCAGGGGGCT             |
| 9                                           | 2,206,199      | <b>CGGTTACCTCCGCCTGCGCGGAGCGGAC</b> GCCGCGACGAGGGCGGGCTCGACCATGGCTG              |
| 10                                          | 2,206,260      | <b>CGGTTACCTCCGCCTGCGCGGAGCGGAC</b> GCGATGCGCAGCTTCTCGGCCTCCTCGGCAGC             |
| 11                                          | 2,206,321      | <b>CGGTTACCTCCGCCTGCGCGGAGCGGAC</b> TGCGAAGTTCACAATGACCCCGGTGCGAGAGT             |
| 12                                          | 2,206,382      | <b>CGGTTACCTCCGCCTGCGCGGAGCGGAC</b> GTCTTACGAACACCGGTACCGCCATACCCAC              |
| 13                                          | 2,206,443      | <b>CGGTTACCTCCGCCTGCGCGGAGCGGAC</b> CGCGCCTGCCTGCTCGCCGTCGAGTCCGCCGA             |
| 14                                          | 2,206,504      | <b>CGGTTACCTCCGCCTGCGCGGAGCGGAC</b> GCCTTCTTGCCGGTGGCCCTGTACTCCAGGGC             |
| 15                                          | 2,206,565      | <b>CGGTTACCTCCGCCTGCGCGGAGCGGAC</b> GTCCCGCTCCCGCTCCCGGAGAGGCCCCCA               |
| 16                                          | 2,206,626      | <b>TGGTTACCTCCGCCTGCGCGGAGCGGAC</b> AGTGTGCGGTGTGCTGGTAGGAGGTGGAGAGGA            |
| 17                                          | 2,206,687      | <b>CGGTTACCTCCGCCTGCGCGGAGCGGAC</b> GCCCGCACACCGCCACCCGACAGCAGGCCCG              |
| 18                                          | 2,206,748      | <b>CGGTTACCTCCGCCTGCGCGGAGCGGAC</b> CGTAGGACGCTCCGCAGGAGCTCCTCGCCGGT             |
| 19                                          | 2,206,809      | <b>CGGTTACCTCCGCCTGCGCGGAGCGGAC</b>                                              |
| CRISPR repeat #2 (nt 2,216,850 – 2,217,182) |                |                                                                                  |
| 20                                          | 2,216,850      | <b>GGGTTACCTCCGCCTGCGCGGAGCGGAC</b> ACGCGGAAGCTGCTCTTCGTGACCGGCTGGA              |
| 21                                          | 2,216,911      | <b>CGGTTACCTCCGCCTGCGCGGAGCGGAC</b> GACGGAATCACCCGAAGTTCTCGGGCCATC               |
| 22                                          | 2,216,971      | <b>CGGTTACCTCCGCCTGCGCGGAGCGGAC</b> TACGCGGGTGTGCGGTGCAGGCGGGCCTGCCGT            |
| 23                                          | 2,217,032      | <b>CGGTTACCTCCGCCTGCGCGGAGCGGAC</b> GCCCGTGCTCCACCACTCGGCATGTGCGGTCTC            |
| 24                                          | 2,217,093      | <b>CGGTTACCTCCGCCTGCGCGGAGCGGAC</b> GTGCGCCGTGGGCGGCGGCCCGGAATGGACAA             |
| 25                                          | 2,217,154      | <b>CGGTTACCTCCGCCTGCGCGGAGCGGAC</b>                                              |
